# Supplementary material for: Mapping Soil-Transmitted Helminth Parasite Infection in Rwanda: Estimating Endemicity and Identifying At-Risk Populations
Source: PubMed Central journal article supplement (PMC6630518; doi:10.3390/tropicalmed4020093), 2019-06-14
Supplement: tropicalmed-04-00093-s001.pdf [file tropicalmed-04-00093-s001.pdf]

# Mapping soil-transmitted helminth parasite infection in Rwanda: estimating endemicity and identifying at-risk populations

## Supplementary File 1

Eugene Ruberanziza<sup>1\*</sup>, Kei Owada<sup>2,3\*</sup>, Nicholas J. Clark<sup>2,3</sup>, Irene Umulisa<sup>1</sup>, Giuseppina Ortu<sup>4</sup>, Warren Lancaster<sup>5</sup>, Tharcisse Munyaneza<sup>6</sup>, Aimable Mbituyumuremyi<sup>7</sup>, Ursin Bayisenge<sup>1</sup>, Alan Fenwick<sup>4</sup>, Ricardo J. Soares Magalhães<sup>2,3</sup>

<sup>1</sup> Neglected Tropical Diseases and Other Parasitic Diseases Unit, Malaria and Other Parasitic Diseases Division, Rwanda Biomedical Center, Ministry of Health, Kigali, Rwanda

<sup>2</sup> UQ Spatial Epidemiology Laboratory, School of Veterinary Science, the University of Queensland, Gatton 4343, Queensland, Australia

<sup>3</sup> Children Health and Environment Program, Child Health Research Centre, The University of Queensland, South Brisbane 4101, Queensland, Australia

<sup>4</sup> Schistosomiasis Control Initiative (SCI), Department of Infectious Diseases Epidemiology, Imperial College, London, United Kingdom

<sup>5</sup> The END Fund, New York, New York, United States of America

<sup>6</sup> Microbiology Unit, National Reference Laboratory (NRL) Division, Rwanda Biomedical Center, Ministry of Health, Kigali, Rwanda

<sup>7</sup> Malaria and Other Parasitic Diseases Division, Rwanda Biomedical Center, Ministry of Health, Kigali, Rwanda

**Figure S1:** Semivariograms of observed and residual spatial dependence.

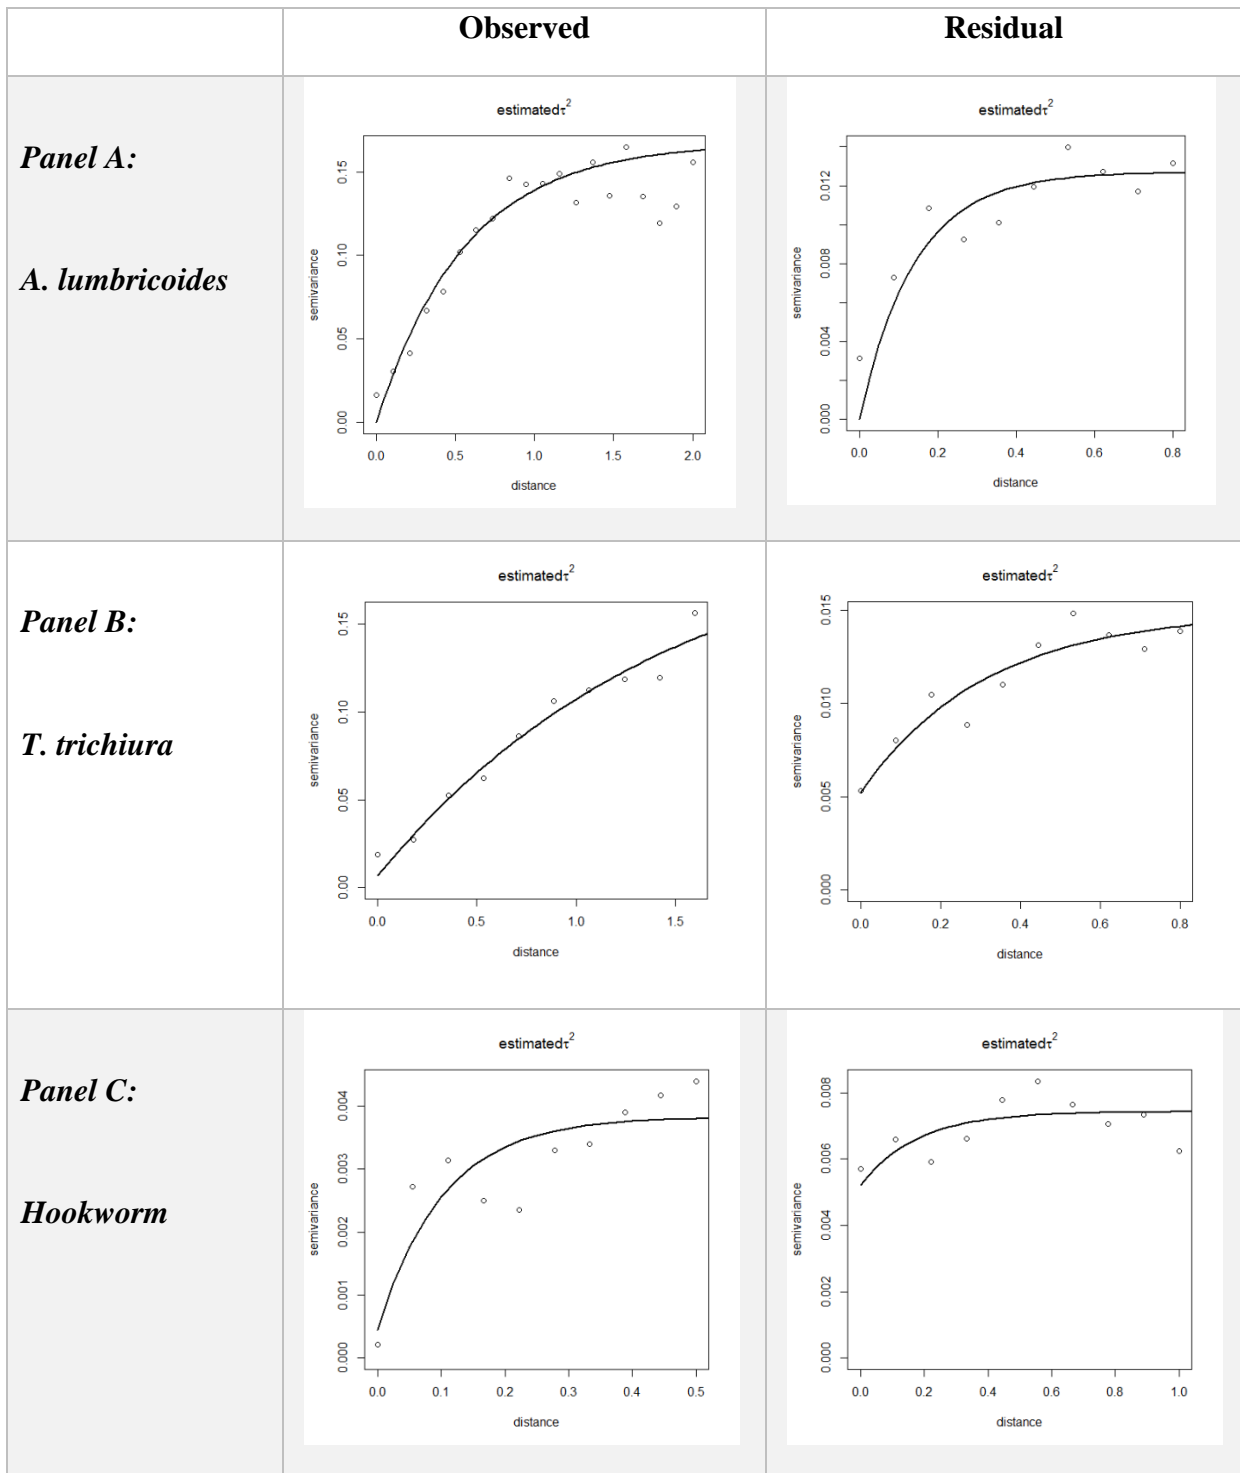

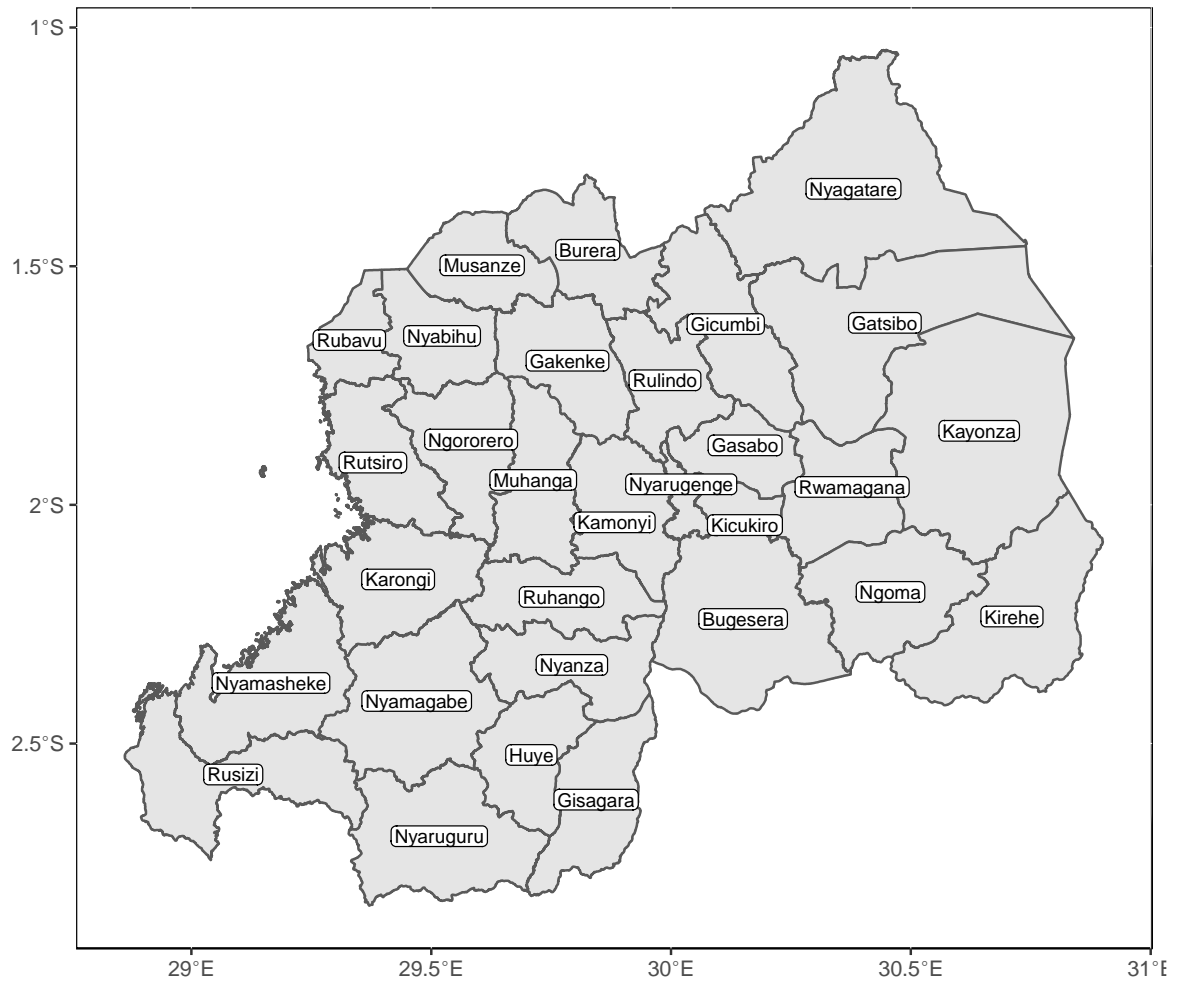

**Figure S2:** Map of Rwanda’s provincial districts. This figure was produced in R version 3.5 using a shapefile representing Rwanda’s current administrative units (obtained from the data warehouse DIVA GIS ([www.diva-gis.org/Data](http://www.diva-gis.org/Data))).

**Table S1:** Prevalence of soil-transmitted (STH) helminth infection, represented as proportions of surveyed individuals found to be infected with at least one STH parasite (STH), *A. lumbricoides*, *T. trichiura* and hookworm, in Rwanda across two survey periods

| District | 2008 STH | 2008 Ascaris | 2008 Hookworm | 2008 Trichuris | 2014 STH | 2014 Ascaris | 2014 Hookworm | 2014 Trichuris |
|----------|----------|--------------|---------------|----------------|----------|--------------|---------------|----------------|
| Bugesera | 0.432    | 0.028        | 0.402         | 0.036          | 0.108    | 0.064        | 0.028         | 0.036          |
| Burera   | 0.958    | 0.865        | 0.015         | 0.663          | 0.802    | 0.734        | 0.046         | 0.542          |
| Gakenke  | 0.678    | 0.496        | 0.347         | 0.373          | 0.469    | 0.403        | 0.071         | 0.183          |
| Gasabo   | 0.152    | 0.052        | 0.100         | 0.013          | 0.057    | 0.029        | 0.017         | 0.014          |
| Gatsibo  | 0.543    | 0.078        | 0.519         | 0.053          | 0.244    | 0.180        | 0.048         | 0.052          |
| Gicumbi  | 0.686    | 0.322        | 0.462         | 0.136          | 0.526    | 0.486        | 0.011         | 0.223          |
| Gisagara | 0.588    | 0.279        | 0.467         | 0.067          | 0.293    | 0.240        | 0.047         | 0.037          |
| Huye     | 0.720    | 0.614        | 0.305         | 0.127          | 0.455    | 0.439        | 0.016         | 0.053          |
| Kamonyi  | 0.421    | 0.100        | 0.342         | 0.038          | 0.196    | 0.128        | 0.028         | 0.048          |
| Karongi  | 0.675    | 0.542        | 0.136         | 0.301          | 0.723    | 0.589        | 0.031         | 0.374          |
| Kayonza  | 0.452    | 0.013        | 0.431         | 0.016          | 0.177    | 0.067        | 0.080         | 0.063          |
| Kicukiro | 0.076    | 0.040        | 0.000         | 0.049          | 0.021    | 0.008        | 0.008         | 0.004          |
| Kirehe   | 0.796    | 0.008        | 0.779         | 0.088          | 0.168    | 0.040        | 0.100         | 0.040          |
| Muhanga  | 0.753    | 0.300        | 0.563         | 0.057          | 0.250    | 0.193        | 0.043         | 0.027          |

| <b>District</b> | <b>2008<br/>STH</b> | <b>2008<br/>Ascar<br/>is</b> | <b>2008<br/>Hookwor<br/>m</b> | <b>2008<br/>Trichur<br/>is</b> |  | <b>2014<br/>STH</b> | <b>2014<br/>Ascar<br/>is</b> | <b>2014<br/>Hookwor<br/>m</b> | <b>2014<br/>Trichur<br/>is</b> |
|-----------------|---------------------|------------------------------|-------------------------------|--------------------------------|--|---------------------|------------------------------|-------------------------------|--------------------------------|
| Musanze         | 0.947               | 0.795                        | 0.210                         | 0.705                          |  | 0.771               | 0.655                        | 0.033                         | 0.552                          |
| Ngoma           | 0.533               | 0.004                        | 0.521                         | 0.050                          |  | 0.105               | 0.095                        | 0.007                         | 0.003                          |
| Ngororero       | 0.789               | 0.620                        | 0.413                         | 0.112                          |  | 0.588               | 0.508                        | 0.064                         | 0.124                          |
| Nyabihu         | 0.915               | 0.847                        | 0.119                         | 0.617                          |  | 0.884               | 0.824                        | 0.004                         | 0.424                          |
| Nyagatare       | 0.657               | 0.240                        | 0.492                         | 0.157                          |  | 0.225               | 0.053                        | 0.143                         | 0.073                          |
| Nyamagabe       | 0.822               | 0.744                        | 0.157                         | 0.467                          |  | 0.563               | 0.535                        | 0.020                         | 0.220                          |
| Nyamasheke      | 0.922               | 0.611                        | 0.336                         | 0.725                          |  | 0.563               | 0.417                        | 0.051                         | 0.257                          |
| Nyanza          | 0.494               | 0.085                        | 0.464                         | 0.055                          |  | 0.128               | 0.080                        | 0.032                         | 0.020                          |
| Nyarugenge      | 0.203               | 0.031                        | 0.114                         | 0.095                          |  | 0.060               | 0.052                        | 0.000                         | 0.012                          |
| Nyaruguru       | 0.874               | 0.824                        | 0.167                         | 0.531                          |  | 0.799               | 0.779                        | 0.028                         | 0.225                          |
| Rubavu          | 0.955               | 0.827                        | 0.000                         | 0.909                          |  | 0.896               | 0.779                        | 0.003                         | 0.842                          |
| Ruhango         | 0.544               | 0.194                        | 0.435                         | 0.017                          |  | 0.120               | 0.092                        | 0.012                         | 0.016                          |
| Rulindo         | 0.718               | 0.564                        | 0.174                         | 0.386                          |  | 0.468               | 0.456                        | 0.004                         | 0.116                          |
| Rusizi          | 0.715               | 0.559                        | 0.254                         | 0.361                          |  | 0.754               | 0.549                        | 0.096                         | 0.549                          |
| Rutsiro         | 0.935               | 0.805                        | 0.264                         | 0.687                          |  | 0.877               | 0.835                        | 0.005                         | 0.599                          |
| Rwamagana       | 0.701               | 0.027                        | 0.683                         | 0.016                          |  | 0.077               | 0.012                        | 0.056                         | 0.008                          |
